# Supplementary material for: Region of Attainable Redaction, an extension of Ellipse of Insignificance analysis for gauging impacts of data redaction in dichotomous outcome trials
Source: eLife journal article supplement (doi:10.7554/elife.93050), 2024-01-29
Supplement: supp1 [file elife-93050-supp1-v2.pdf]

# Region of Attainable Redaction, an extension of Ellipse of Insignificance analysis for gauging impacts of data redaction in dichotomous outcome trials - Mathematical Appendix

David Robert Grimes<sup>1,2</sup>

<sup>1</sup>School of Medicine, Trinity College Dublin, Dublin, Ireland

<sup>2</sup>School of Physical Sciences, Dublin City University, Dublin, Ireland

\*[davidrobert.grimes@dcu.ie](mailto:davidrobert.grimes@dcu.ie) / [davidrobert.grimes@tcd.ie](mailto:davidrobert.grimes@tcd.ie)

## ABSTRACT

Mathematical appendices for ROAR analysis - Form of  $g(x,y)$  and  $h(x,y)$ .

## Coefficients of $g(x,y)$

Table S1

| Experimental arm with significantly higher risk ( $RR_e > 1$ ) |                                                             |
|----------------------------------------------------------------|-------------------------------------------------------------|
| Variable                                                       | Coefficient                                                 |
| $x^3y^2$                                                       | 1                                                           |
| $x^3y$                                                         | $2c$                                                        |
| $x^3$                                                          | $c^2$                                                       |
| $x^2y^3$                                                       | 1                                                           |
| $x^2y^2$                                                       | $n + 2(b+c) - v$                                            |
| $x^2y$                                                         | $4bc + c^2 - 2ad + 2cn - (a + 2c + d)v$                     |
| $x^2$                                                          | $c(2bc - 2ad + cn) - (a + c)(c + d)v$                       |
| $xy^3$                                                         | $2b$                                                        |
| $xy^2$                                                         | $b^2 + 4bc - 2ad + 2bn - (a + 2b + d)v$                     |
| $xy$                                                           | $2(b+c)(bc - ad) + 4bcn - 2adn - (a + 2b + d)(a + 2c + d)v$ |
| $x$                                                            | $(bc - ad)(bc - ad + 2cn) - (a + c)(a + 2b + d)(c + d)v$    |
| $y^3$                                                          | $b^2$                                                       |
| $y^2$                                                          | $b(-2ad + b(2c + n)) - (a + b)(b + d)v$                     |
| $y$                                                            | $(bc - ad)(-ad + b(c + 2n)) - (a + b)(b + d)(a + 2c + d)v$  |
| Constant term                                                  | $(bc - ad)^2n - (a + b)(a + c)(b + d)(c + d)v$              |
| Experimental arm with significantly lower risk ( $RR_e < 1$ )  |                                                             |
| Variable                                                       | Coefficient                                                 |
| $x^3y^2$                                                       | 1                                                           |
| $x^3y$                                                         | $2d$                                                        |
| $x^3$                                                          | $d^2$                                                       |
| $x^2y^3$                                                       | 1                                                           |
| $x^2y^2$                                                       | $n + 2(a+d) - v$                                            |
| $x^2y$                                                         | $4ad + d^2 - 2bc + 2dn - (b + 2d + c)v$                     |
| $x^2$                                                          | $d(2ad - 2bc + dn) - (b + d)(c + d)v$                       |
| $xy^3$                                                         | $2a$                                                        |
| $xy^2$                                                         | $a^2 + 4ad - 2bc + 2an - (b + 2a + c)v$                     |
| $xy$                                                           | $2(a+d)(ad - bc) + 4adn - 2bcn - (b + 2a + c)(b + 2d + c)v$ |
| $x$                                                            | $(bc - ad)(bc - ad - 2dn) - (b + d)(b + 2a + c)(c + d)v$    |
| $y^3$                                                          | $a^2$                                                       |
| $y^2$                                                          | $a(-2bc + a(2d + n)) - (a + b)(a + c)v$                     |
| $y$                                                            | $(bc - ad)(bc - a(d + 2n)) - (a + b)(a + c)(b + 2d + c)v$   |
| Constant term                                                  | $(bc - ad)^2n - (a + b)(a + c)(b + d)(c + d)v$              |

Coefficients of resultant cubic curve  $g(x,y)$

## Coefficients of $h(x,y)$

Table S2

| Experimental arm with significantly higher risk ( $RR_e > 1$ ) |                                                                |
|----------------------------------------------------------------|----------------------------------------------------------------|
| Variable                                                       | Coefficient                                                    |
| $x^4y$                                                         | -2                                                             |
| $x^4$                                                          | -2c                                                            |
| $x^3y^2$                                                       | -3                                                             |
| $x^3y$                                                         | $-2(2b + 2c + n - v)$                                          |
| $x^3$                                                          | $-4bc - c^2 + 2ad - 2cn + (a + 2c + d)v$                       |
| $x^2y^3$                                                       | 3                                                              |
| $x^2y^2$                                                       | $-6b + 6c$                                                     |
| $x^2y$                                                         | $-2b^2 + 3c^2 + 4ad - 4b(2c + n - v) + 2(a + d)v$              |
| $x^2$                                                          | $-2(b + c)(bc - ad) - 4bcn + 2adn + (a + 2b + d)(a + 2c + d)v$ |
| $xy^4$                                                         | 2                                                              |
| $xy^3$                                                         | $2(2b + 2c + n - v)$                                           |
| $xy^2$                                                         | $-3b^2 + 8bc + 2c^2 - 4ad + 4cn - 2(a + 2c + d)v$              |
| $xy$                                                           | $2(b - c)(-2bc + 2ad - bn - cn + nv)$                          |
| $x$                                                            | $-(bc - ad)(-ad + b(c + 2n)) + (a + b)(b + d)(a + 2c + d)v$    |
| $y^4$                                                          | 2b                                                             |
| $y^3$                                                          | $b^2 + 4bc - 2ad + 2bn - (a + 2b + d)v$                        |
| $y^2$                                                          | $2(b + c)(bc - ad) + 4bcn - 2adn - (a + 2b + d)(a + 2c + d)v$  |
| $y$                                                            | $(bc - ad)(bc - ad + 2cn) - (a + c)(a + 2b + d)(c + d)v$       |
| Experimental arm with significantly lower risk ( $RR_e < 1$ )  |                                                                |
| Variable                                                       | Coefficient                                                    |
| $x^4y$                                                         | -2                                                             |
| $x^4$                                                          | -2d                                                            |
| $x^3y^2$                                                       | -3                                                             |
| $x^3y$                                                         | $-2(2a + 2d + n - v)$                                          |
| $x^3$                                                          | $-4ad - d^2 + 2bc - 2dn + (b + 2d + c)v$                       |
| $x^2y^3$                                                       | 3                                                              |
| $x^2y^2$                                                       | $-6a + 6d$                                                     |
| $x^2y$                                                         | $-2a^2 + 3d^2 + 4bc - 4a(2d + n - v) + 2(b + c)v$              |
| $x^2$                                                          | $-2(a + d)(ad - bc) - 4adn + 2bcn + (b + 2a + c)(b + 2d + c)v$ |
| $xy^4$                                                         | 2                                                              |
| $xy^3$                                                         | $2(2a + 2d + n - v)$                                           |
| $xy^2$                                                         | $-3a^2 + 8ad + 2d^2 - 4bc + 4dn - 2(b + 2d + c)v$              |
| $xy$                                                           | $2(a - d)(2bc - 2ad - an - dn + nv)$                           |
| $x$                                                            | $-(bc - ad)(bc - a(d + 2n)) + (a + b)(a + c)(b + 2d + c)v$     |
| $y^4$                                                          | 2a                                                             |
| $y^3$                                                          | $a^2 + 4ad - 2bc + 2an - (b + 2a + c)v$                        |
| $y^2$                                                          | $2(a + d)(ad - bc) + 4adn - 2bcn - (b + 2a + c)(b + 2d + c)v$  |
| $y$                                                            | $(bc - ad)(bc - ad - 2dn) - (b + d)(b + 2a + c)(c + d)v$       |

Coefficients of Lagrange derived polynomial  $h(x,y)$
